# Supplementary material
Source: HighWire-hosted journal article supplement (https://jitc.bmj.com/content/11/5/e006581)
Supplement: inline-supplementary-material-1 [file inline-supplementary-material-1.pdf]

**Supplementary Information for****Original research: Androgen receptor blockade resistance with enzalutamide in prostate cancer results in immunosuppressive alterations in the tumor immune microenvironment**

Pengfei Xu, Joy C. Yang, Bo Chen, Christopher Nip, Jonathan E Van Dyke, Xiong Zhang, Hong-Wu Chen, Christopher P. Evans, William J. Murphy, Chengfei Liu\*

\*Corresponding author: Chengfei Liu

**Email:** [cfliu@ucdavis.edu](mailto:cfliu@ucdavis.edu)

**This PDF file includes:**

Supplementary text

Figures S1 to S6

Tables S1 to S2

## **Supplementary Information Text**

### **Supplementary Methods**

#### ***Cell transfection***

For small interfering RNA (siRNA) transfection, cells were seeded at a density of  $0.5 \times 10^5$  cells per well in 12-well plates or  $2 \times 10^5$  cells per well in 6-well plates and transfected with 20nM of siRNA targeting the AR exon7 sequence (UCAAGGAACUCGAUCGUAU), AR-V7 sequence (GUAGUUGUGAGUAUCAUGA) or siControl (Invitrogen Catalog# 12935300) using Lipofectamine-iMAX (Invitrogen). The effect of siRNA-mediated gene silencing was examined using qRT-PCR and western blot 2-3 days after transfection. The cells were transiently transfected with plasmids expressing PD-L1 luciferase using Lipofectamine 2000 (Invitrogen).

#### ***Western blot analysis***

Whole cell protein extracts were resolved on SDS-PAGE and proteins were transferred to nitrocellulose membranes. After blocking for 1 h at room temperature in 5% milk in PBS/0.1% Tween-20, membranes were incubated overnight at 4 °C with the indicated primary antibodies AR (441), AR (N-20), 1:1000 dilution, Santa Cruz Biotechnology, Santa Cruz, CA; PD-L1 antibody (13684, 1:1000 dilution, Cell Signaling Technology, Danvers, MA); CXCL-10 antibody (14969, 1:1000 dilution, Cell Signaling Technology); GAPDH antibody (5174, 1:1000 dilution, Cell Signaling Technology); tubulin (T5168, Monoclonal Anti- $\alpha$ -Tubulin antibody, 1:5000 dilution, Sigma-Aldrich, St. Louis, MO). Tubulin was used

as a loading control. Following incubation with secondary antibodies (W401 and W402, 1:5000 dilution, Promega, Madison, WI), immunoreactive proteins were visualized with an enhanced chemiluminescence detection system (Millipore, Billerica, MA).

### ***Real-Time quantitative RT-PCR***

Total RNA was extracted using a RNeasy Mini Kit (Qiagen). cDNA was prepared after digestion with RNase-free RQ1 DNase (Promega) and subjected to real-time reverse transcription-PCR (RT-PCR) using SsoFast Eva Green Supermix (Bio-Rad) according to the manufacturer's instructions as described previously <sup>1</sup>. Each reaction was normalized by the co-amplification of actin. Triplicate samples were run using the default settings of a Bio-Rad CFX-96 real-time cycler. The primer sequences are in **Table S1**.

### ***Luciferase assay***

C4-2B cells were transfected with pGL3-PD-L1-Luc reporters (Add gene Plasmid #107003) along with different concentration of DHT with or without enzalutamide in CS-FBS medium. Cell lysates were subjected to luciferase assays using the Luciferase Assay System (Promega) as described previously <sup>1</sup>.

### ***Cell growth assay***

Myc-CaP and Myc-CaP MDVR cells were seeded in 12-well plates at a density of  $0.2 \times 10^5$  cells/well in DMEM containing 10% FBS and treated with different concentration of enzalutamide or apalutamide for 3 days. The total cell numbers were counted.

### ***Clonogenic Assay***

Myc-CaP and Myc-CaP MDVR cells were treated with 20 and 40  $\mu$ M enzalutamide, respectively. Cells were plated at an equal density (400 cells/dish) in 6-well plates for 3 weeks, and the medium was changed every 7 days. The colonies were rinsed with PBS before staining with 0.5% crystal violet/4% formaldehyde for 30 min and the number of colonies was counted.

### ***RNA-seq data analysis***

RNA was extracted from the Myc-CaP and Myc-CaP MDVR cells. RNA-seq libraries from 1  $\mu$ g of total RNA were prepared using the Illumina Tru-Seq RNA Sample, according to the manufacturer's instructions. The mRNA-Seq paired-end library was prepared using Illumina NGS on a HiSeq 4000: 2  $\times$ 150 cycles/bases (150bp, PE). Around 30M reads/sample were obtained. Data analysis was performed with a Top Hat-Cufflinks pipeline and sequence read mapping/alignment using HISAT. StringTie data were mapped to and quantified for 54,532 unique genes/transcripts, and gene and transcript expression was quantified as Fragments per kilobase of transcript per million mapped reads (FPKM). Principal component analysis (PCA) was conducted on the FPKM gene-level data for all genes/transcripts passing the filter (filtered on expression > 0.1) in the raw data. The relatedness of the differentially expressed genes between Myc-CaP parental and Myc-CaP MDVR cells was depicted with a heatmap using R.

### ***Gene Set Enrichment Analysis (GSEA)***

GSEA was performed using Java desktop software (<http://software.broadinstitute.org/gsea/index.jsp>), as described previously<sup>2</sup>. Genes were

ranked according to the shrunken limma log<sub>2</sub> fold changes, and the GSEA tool was used in the 'pre-ranked' mode with all default parameters. Immune-related signaling pathways were used for GSEA analysis.

### ***Datasets and Patient cohorts***

The Stand Up 2 Cancer/Prostate Cancer Foundation-funded West Coast Prostate Cancer Dream Team (SU2C/PCF) dataset, Memorial Sloan-Kettering Cancer Center (MSKCC), Beltran NEPC, and Fred Hutchinson CRC data set were downloaded from the cBioPortal for Cancer Genomics ([www.cbioportal.org](http://www.cbioportal.org)). The expression levels of AR, KLK3, NKX3-1, FKBP5, and CD274 were examined and correlated.

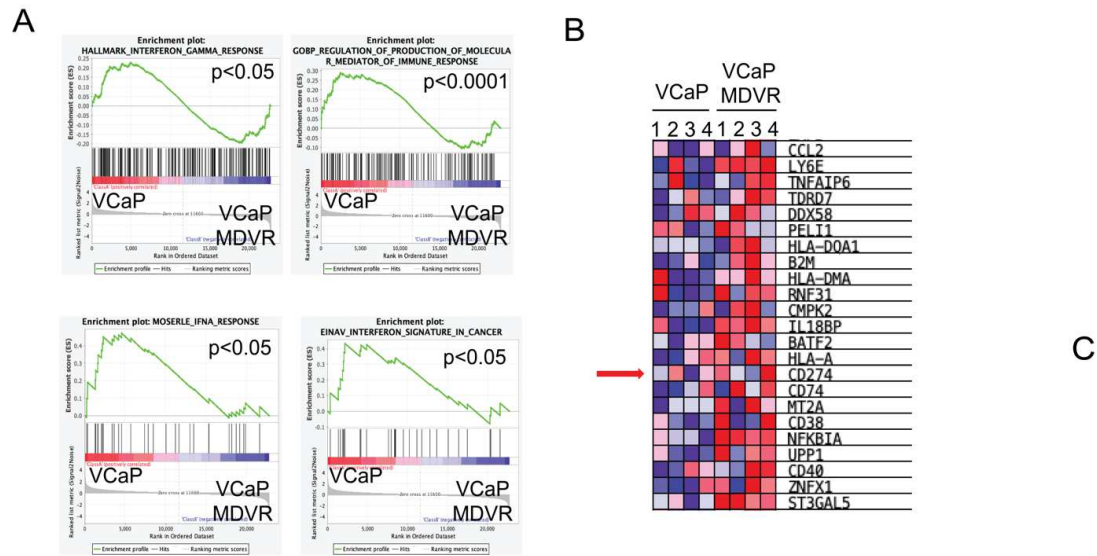

### Supplemental Figure 1

**Supplementary Fig.1. Immune-related signaling pathways are downregulated in enzalutamide resistant VCaP MDVR cells.** RNA seq data from GSE78201 was extracted and subjected to GSEA. The GSEA plots of immune-related signaling pathways were presented.

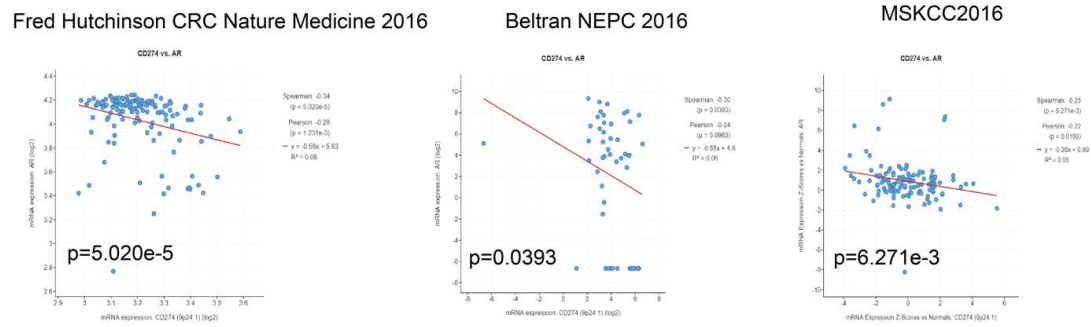

## Supplemental Figure 2

**Supplementary Fig.2. AR negatively correlates with CD274 in three independent CRPC patient databases.** The gene expression data from four CRPC patient databases was extracted from cBioPortal, and AR and CD274 correlations were determined by Spearman correlation.

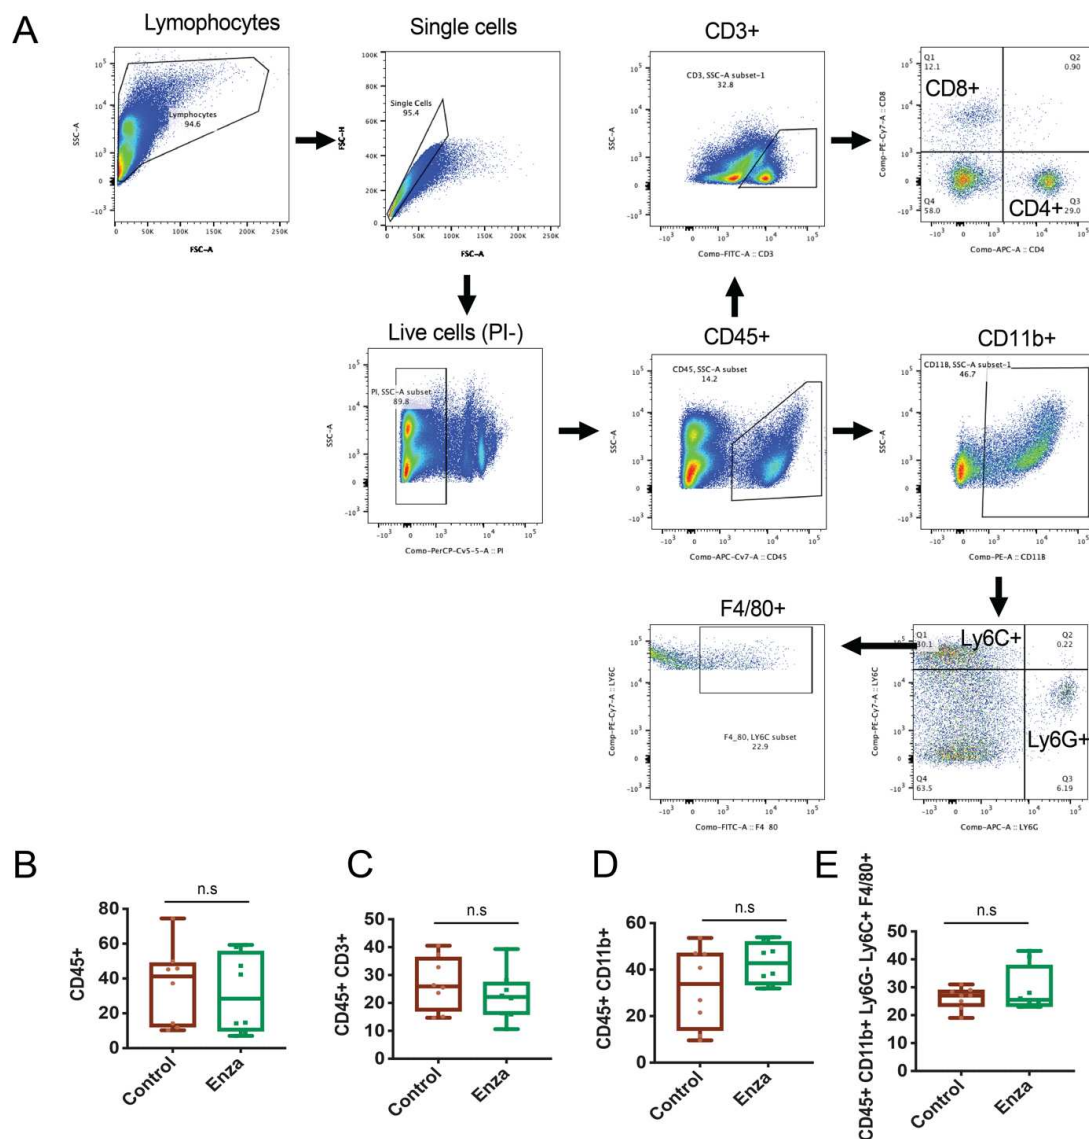

## Supplemental Figure 3

**Supplementary Fig.3. Enzalutamide treatment suppresses Myc-CaP tumor growth. A.**

Gating strategy of Myc CaP tumors to determine the population of T cells ( $CD45^+$ ,  $CD3^+$ ,  $CD4^+$   $CD8^+$ ), PMN-MDSC ( $CD45^+CD11b^+Ly6G^+Ly6C^{low}$ ), M-MDSC ( $CD45^+CD11b^+Ly6G^-Ly6C^{high}$ ), and macrophage ( $CD45^+CD11b^+Ly6G^-Ly6C^{high}F4/80^+$ ).

**B-E.** The lymphocytes ( $CD45^+$ ), total T cells ( $CD45^+$ ,  $CD3^+$ ),  $CD11b^+$  cells, and macrophages ( $CD45^+CD11b^+Ly6G^-Ly6C^{high}F4/80^+$ ) were determined in tumors using flow cytometry. The output histograms were analyzed by FlowJo software and the percentage of population between sublines were plotted. n.s.: not significant.



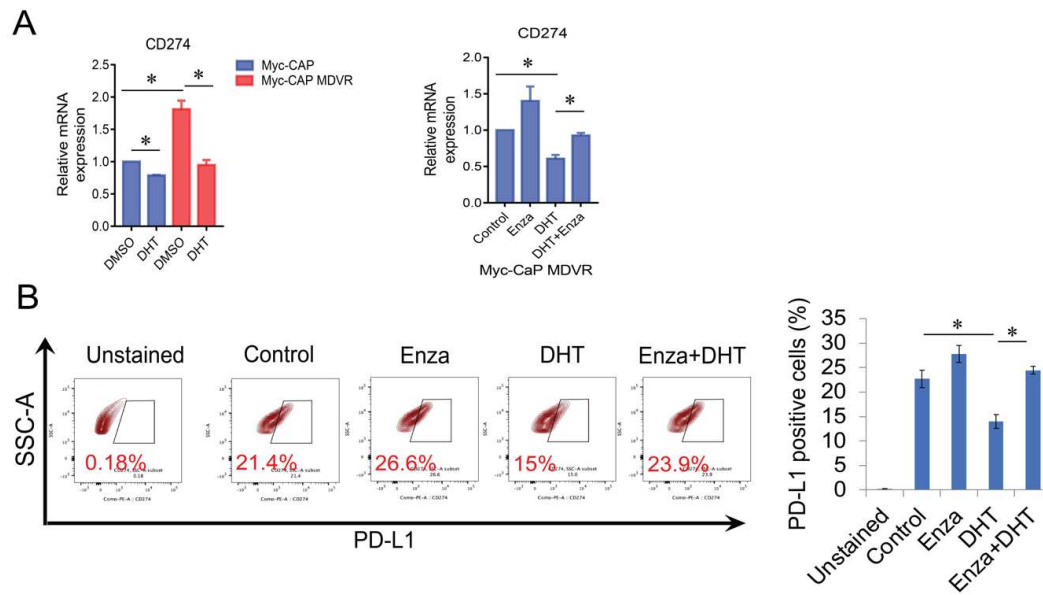

Supplemental Fig.4

**Supplemental Fig.4. PD-L1 expression in Myc CaP MDVR cells. A.** RNA expression levels of PD-L1 in Myc CaP parental and MDVR cells and the response of the latter ones to enzalutamide, DHT or the combined treatment. **B.** Detection of the PD-L1 expressing Myc CaP MDVR cells in response to enzalutamide, DHT or the combined treatment by flow cytometry. The percentages of the PD-L1 positive cells were compared among treatments. \*  $p < 0.05$

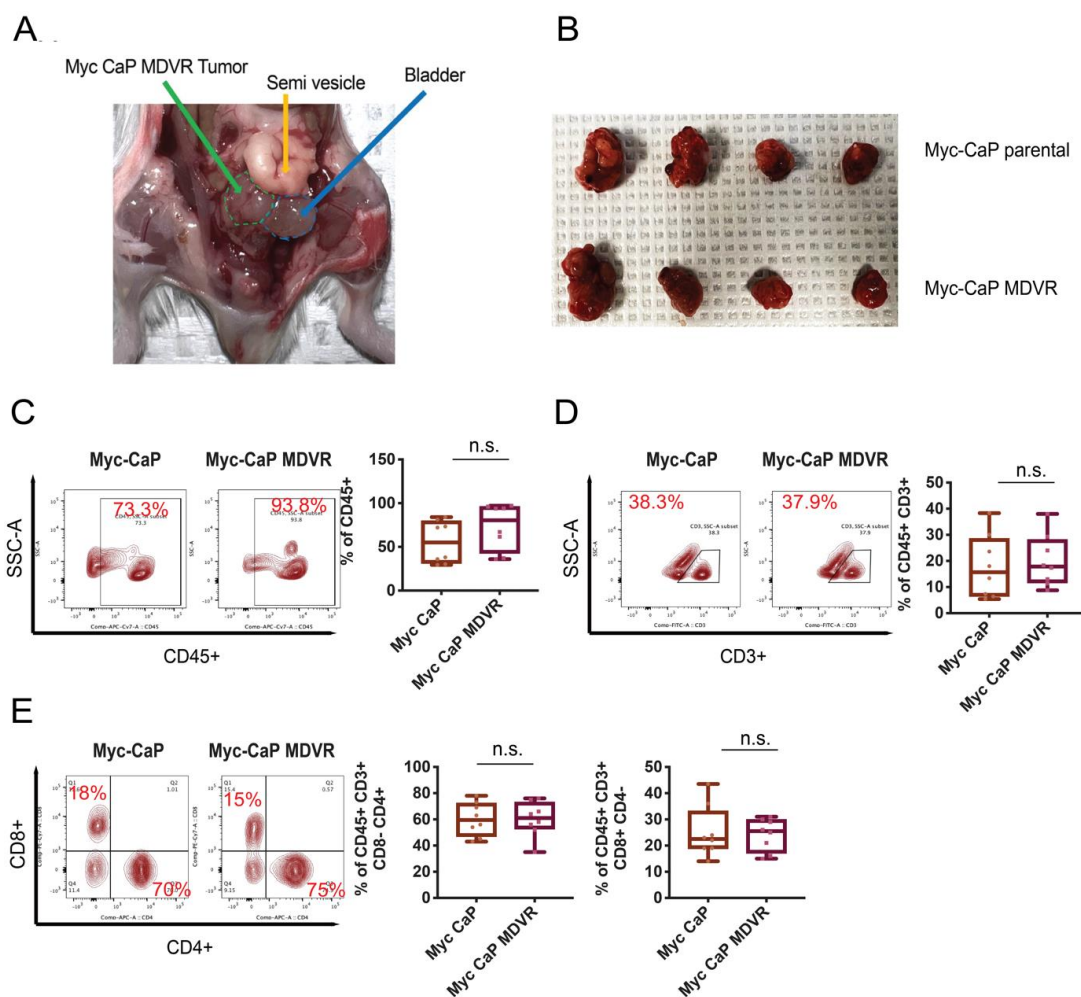

Supplemental Fig.5

**Supplementary Fig.5. The population of tumor infiltrating cells in orthotopic Myc-CaP and Myc-CaP MDVR tumors were determined. A-B.** The orthotopic tumor model was established in FVB mouse with injecting Myc-CaP parental and Myc-CaP MDVR cells (n=4). **C-E.** Tumor infiltrating cells were isolated from Myc-CaP and Myc-CaP MDVR orthotopic tumors respectively and incubated with fluorophores-conjugated antibodies to determine the total lymphocytes (CD45<sup>+</sup>), total T cells (CD45<sup>+</sup>, CD3<sup>+</sup>), CD4<sup>+</sup> T cells, CD8<sup>+</sup> T cells, and gated by flow cytometry. The output histograms were analyzed by FlowJo software and the percentage of population between sublines were plotted. n.s.: not significant.

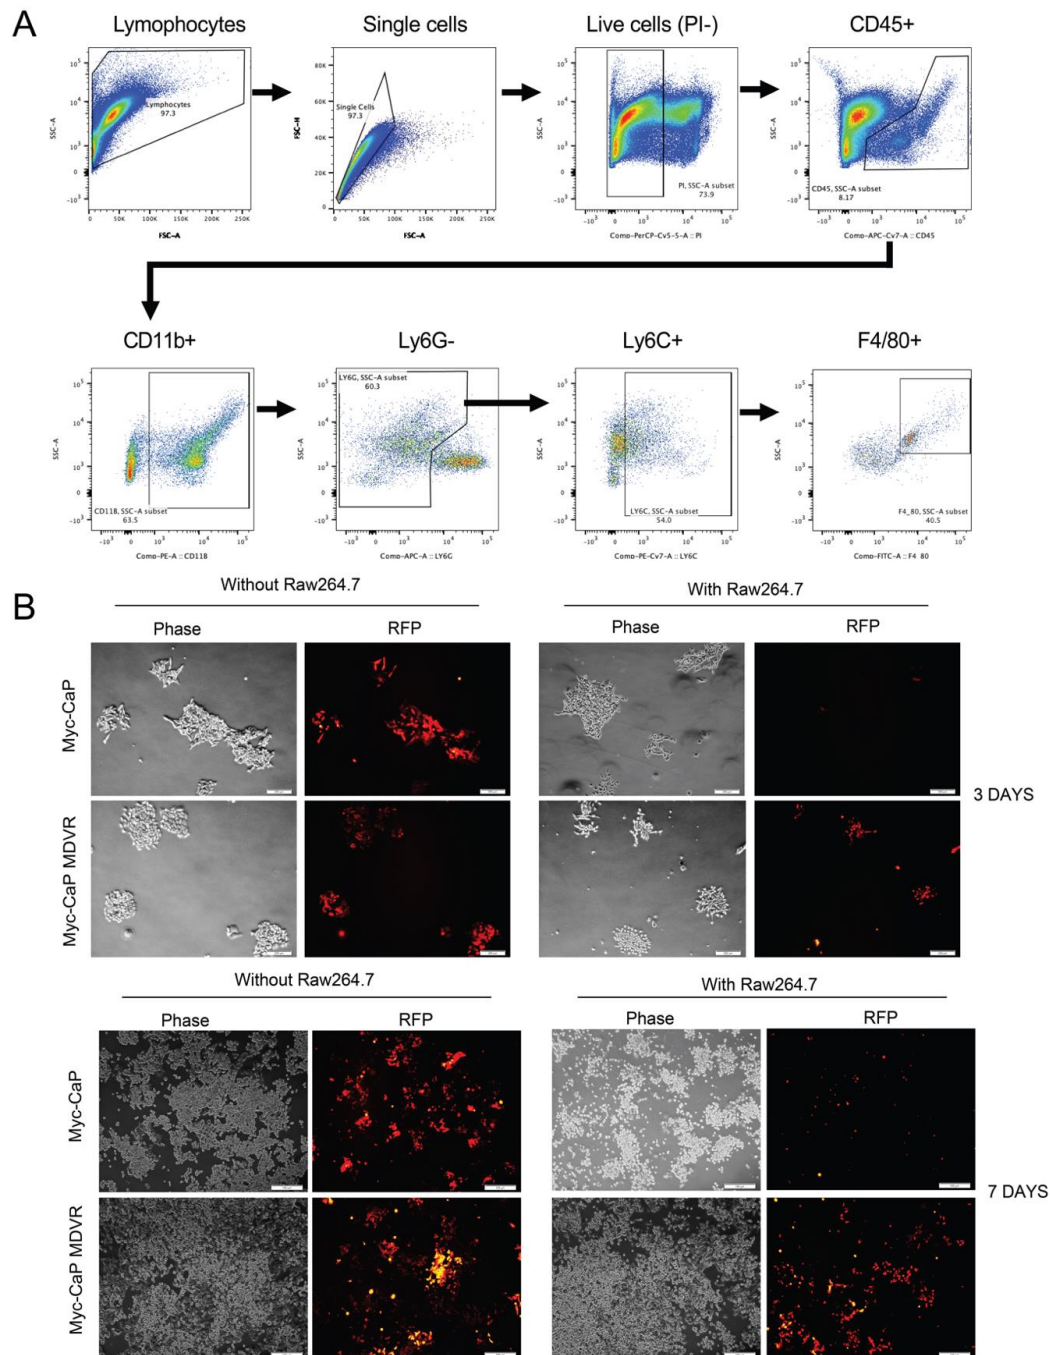

Supplemental Fig.6

**Supplemental Fig.6. A.** Gating strategy for the co-culturing experiments to determine the macrophage ( $CD45^+CD11b^+Ly6GLy6C^{high}F4/80^+$ ) population. **B.** RAW264.7 inhibited Myc-CaP cell growth but had minimal effects on Myc-CaP MDVR cells.  $0.1 \times 10^4$  RAW264.7 was mixed with  $0.5 \times 10^4$  Myc-CaP-RFP or  $0.5 \times 10^4$  Myc-CaP MDVR-RFP cells and the fluorescence confluency was monitored under fluorescence microscope at 3 days and 7 days.

**Table S1.** Primer list for q-PCR

|         | Forward                 | Reverse               |
|---------|-------------------------|-----------------------|
| AR-FL   | AAGCCAGAGCTGTGCAGATGA   | TGTCCTGCAGCCACTGGTTC  |
| AR-V7   | AACAGAAGTACCTGTGCGCC    | TCAGGGTCTGGTCATTTTGA  |
| KLK3    | GCCCTGCCCGAAAGG         | GATCCACTTCCGGTAATGCA  |
| CXCL9   | GGAAGCAGCCAAGTCGGTTA    | AGGAGGTTTCCACATCCTGC  |
| CXCL10  | TGAATCCAGAATCGAAGGCCA   | TGCATCGATTTTGCTCCCCT  |
| CXCL11  | AGGTGGGTGAAAGGACCAAA    | GACTCCTTTGGGCAGTGGAA  |
| CCL20   | CGAATCAGAAGCAGCAAGCAA   | AGCATTGATGTCACAGCCTTC |
| CD274   | TGCCGACTACAAGCGAATTACTG | CTGCTTGCCAGATGACTTCGG |
| IL15    | TGTGGCTCTTTGGAGCAATG    | CGATCTTGTATGGGCTGGCT  |
| IRF1    | ACCCTGGCTAGAGATGCAGA    | TCCTTGTGATGTCCCAGCC   |
| IFI44   | AGACAGAGCAGCTACCCTCA    | CTAAGCCGCTTCCCTCCAAA  |
| ACTIN   | AGAACTGGCCCTTCTTGGAGG   | GTTTTTATGTTCTCTATGGG  |
| mCXCL9  | AACCTCCCACGTAGCTTTCG    | GCCACTAAGCTACAGCCACA  |
| mCXCL10 | ATGACGGGCCAGTGAGAATG    | TCAACACGTGGGCAGGATAG  |
| mCXCL11 | AGTAACGGCTGCGACAAAGT    | CTTGCTTGGATCTGGGGTCC  |
| mCD80   | ACAGTCGTCGTCATCGTTGT    | CCCGAAGGTAAGGCTGTTGT  |
| mCD86   | TGCCGTGCCCATTTACAAAG    | CTGTGCCCAAATAGTGCTCG  |
| mCD68   | ACACTTCGGGCCATGTTTCT    | GGGGCTGGTAGGTTGATTGT  |
| mH2-EB1 | TGTCACGGTCGAGTGGAAG     | AAGTAGATGAACAGCCCCGC  |
| mARG1   | GGTCTGTGGGGAAAGCCAAT    | CAGTGTGAGCATCCACCCAA  |
| mCD206  | GGAGTGATGGAACCCAGTG     | CTGTCCGCCAGTATCCATC   |
| mTGM2   | GGTGTCCCTGAAGAACCAC     | GGAGGCCAATATCAGTCGGG  |
| mCD274  | GGGCGTTTACTATCACGGCT    | CCCAGTACACCACTAACGCA  |
| mAR     | AGGATTCCCAAAGAAGCCGA    | TGGGGTCAACCTGCTCTTTA  |
| mGAPDH  | GTATGACTCCACTCACGGCA    | GCCTCACCCCATTTGATGTT  |

**Table S2. List of flow antibodies used in this study.**

| Antigen          | Type                       | Clone    | Fluorophore  | Company    | Catalog#   | Dilution |
|------------------|----------------------------|----------|--------------|------------|------------|----------|
| CD274<br>(Mouse) | Rat<br>IgG2b, k            | 10F.9G2  | PE           | Biolegend  | 124308     | 1: 100   |
| CD45             | Rat<br>IgG2b,<br>$\lambda$ | I3/2.3   | APC-Cyanine7 | Invitrogen | A15395     | 1: 100   |
| CD3              | Rat<br>IgG2b, k            | 17A2     | FITC         | Invitrogen | 11-0032-82 | 1: 200   |
| CD4              | Rat<br>IgG2a, k            | RM4-5    | APC          | Invitrogen | 17-0042-82 | 1: 200   |
| CD8a             | Rat<br>IgG2a, k            | 53-6.7   | PE-Cyanine7  | Invitrogen | 25-0081-82 | 1: 100   |
| CD11b            | Rat<br>IgG2a, k            | M1/70    | PE           | Invitrogen | 12-0112-82 | 1: 200   |
| Gr-1             | Rat<br>IgG2b, k            | RB6-8C5  | PE-Cyanine7  | Invitrogen | 25-5931-82 | 1: 200   |
| F4/80            | Rat<br>IgG2a, k            | BM8      | FITC         | Invitrogen | 11-4801-82 | 1: 200   |
| Ly6C             | Rat<br>IgG2c, k            | HK1.4    | PE-Cyanine7  | Invitrogen | 25-5932-82 | 1: 200   |
| Ly6G             | Rat<br>IgG2a, k            | 1A8-Ly6g | APC          | Invitrogen | 17-9668-82 | 1: 100   |
| FXOP3            | Rabbit<br>IgG              | 1054C    | PE           | R&D        | IC8214P    | 1: 100   |
| IFN $\gamma$     | Rat IgG1,<br>$\kappa$      | XMG1.2   | PE           | Biolegend  | 505808     | 1: 100   |
| CD274<br>(Human) | Mouse<br>IgG2b, $\kappa$   | 29E.2A3  | APC          | Biolegend  | 329708     | 1: 100   |

**References**

1. Liu C, Lou W, Zhu Y, et al. Intracrine Androgens and AKR1C3 Activation Confer Resistance to Enzalutamide in Prostate Cancer. *Cancer Res* 2015;75(7):1413-22. doi: 10.1158/0008-5472.CAN-14-3080
2. Subramanian A, Tamayo P, Mootha VK, et al. Gene set enrichment analysis: a knowledge-based approach for interpreting genome-wide expression profiles. *Proc Natl Acad Sci U S A* 2005;102(43):15545-50. doi: 0506580102 [pii] 10.1073/pnas.0506580102 [published Online First: 2005/10/04]
